# Supplementary material for: Placental Transcriptome Profiling in Subtypes of Diabetic Pregnancies Is Strongly Confounded by Fetal Sex
Source: MDPI journal article supplement (doi:10.3390/ijms232315388), 2022-12-06
Supplement: s1 [file s1]

## Supplemental material

**Supplement Table S1. Differential expressed genes in diabetic and healthy placentas.**

| Comparison               | Gene iD         | Gene Name | Base Mean | log2fc | Adjusted p-value |
|--------------------------|-----------------|-----------|-----------|--------|------------------|
| DM2 vs CTL, up-regulated | ENSG00000108669 | CYTH1     | 830       | 0.31   | 0.035            |
|                          | ENSG00000170145 | SIK2      | 610       | 0.31   | 0.026            |
|                          | ENSG00000118689 | FOXO3     | 1200      | 0.32   | 0.043            |
|                          | ENSG00000146039 | SLC17A4   | 2.9       | 0.42   | 0.02             |
|                          | ENSG00000124098 | FAM210B   | 450       | 0.44   | 0.026            |
|                          | ENSG00000148842 | CNNM2     | 570       | 0.46   | 0.014            |
|                          | ENSG00000174306 | ZHX3      | 400       | 0.46   | 0.042            |
|                          | ENSG00000180667 | YOD1      | 530       | 0.47   | 0.045            |
|                          | ENSG00000198876 | DCAF12    | 870       | 0.47   | 0.019            |
|                          | ENSG00000153253 | SCN3A     | 13        | 0.49   | 0.009            |
|                          | ENSG00000011478 | QPCTL     | 39        | 0.5    | 0.05             |
|                          | ENSG00000167916 | KRT24     | 4.1       | 0.5    | 0.00048          |
|                          | ENSG00000171608 | PIK3CD    | 170       | 0.52   | 0.044            |
|                          | ENSG00000119636 | BBOF1     | 31        | 0.55   | 0.045            |
|                          | ENSG00000137198 | GMPR      | 67        | 0.55   | 0.026            |
|                          | ENSG00000197465 | GYPE      | 3.3       | 0.55   | 0.043            |
|                          | ENSG00000013306 | SLC25A39  | 610       | 0.56   | 0.011            |
|                          | ENSG00000143416 | SELENBP1  | 240       | 0.56   | 0.043            |
|                          | ENSG00000066926 | FECH      | 500       | 0.57   | 0.009            |
|                          | ENSG00000187997 | C17orf99  | 1.6       | 0.57   | 0.019            |
|                          | ENSG00000198838 | RYR3      | 15        | 0.57   | 0.019            |
|                          | ENSG00000198858 | R3HDM4    | 210       | 0.57   | 0.037            |
|                          | ENSG00000204613 | TRIM10    | 2.3       | 0.57   | 0.01             |
|                          | ENSG00000119138 | KLF9      | 150       | 0.58   | 0.048            |
|                          | ENSG00000165702 | GFI1B     | 4.8       | 0.58   | 0.033            |
|                          | ENSG00000166741 | NNMT      | 350       | 0.58   | 0.041            |
|                          | ENSG00000213626 | LBH       | 590       | 0.58   | 0.048            |

|  |                 |           |       |      |         |
|--|-----------------|-----------|-------|------|---------|
|  | ENSG00000256269 | HMBS      | 75    | 0.59 | 0.03    |
|  | ENSG00000168386 | FILIP1L   | 630   | 0.6  | 0.038   |
|  | ENSG00000197405 | C5AR1     | 87    | 0.6  | 0.035   |
|  | ENSG00000157103 | SLC6A1    | 20    | 0.61 | 0.042   |
|  | ENSG00000162426 | SLC45A1   | 2.6   | 0.61 | 0.026   |
|  | ENSG00000188536 | HBA2      | 3200  | 0.61 | 0.04    |
|  | ENSG00000272808 | NA        | 5.8   | 0.61 | 0.019   |
|  | ENSG00000104856 | RELB      | 64    | 0.63 | 0.0084  |
|  | ENSG00000136542 | GALNT5    | 2.8   | 0.63 | 0.009   |
|  | ENSG00000166947 | EPB42     | 54    | 0.63 | 0.021   |
|  | ENSG00000113070 | HBEGF     | 82    | 0.64 | 0.027   |
|  | ENSG00000137801 | THBS1     | 5700  | 0.64 | 0.026   |
|  | ENSG00000158578 | ALAS2     | 620   | 0.64 | 0.022   |
|  | ENSG00000011422 | PLAUR     | 83    | 0.65 | 0.011   |
|  | ENSG00000042062 | RIPOR3    | 55    | 0.65 | 0.014   |
|  | ENSG00000125398 | SOX9      | 3.2   | 0.65 | 0.00063 |
|  | ENSG00000173432 | SAA1      | 29    | 0.65 | 0.00016 |
|  | ENSG00000280237 | MIR4697HG | 38    | 0.65 | 0.024   |
|  | ENSG00000206172 | HBA1      | 590   | 0.66 | 0.019   |
|  | ENSG00000250361 | GYPB      | 13    | 0.66 | 0.009   |
|  | ENSG00000164949 | GEM       | 33    | 0.67 | 0.017   |
|  | ENSG00000196565 | HBG2      | 11000 | 0.67 | 0.01    |
|  | ENSG00000206177 | HBM       | 18    | 0.67 | 0.009   |
|  | ENSG00000136929 | HEMGN     | 140   | 0.68 | 0.011   |
|  | ENSG00000147454 | SLC25A37  | 900   | 0.68 | 0.009   |
|  | ENSG00000178878 | APOLD1    | 910   | 0.69 | 0.009   |
|  | ENSG00000211582 | MIR758    | 22    | 0.69 | 0.0067  |
|  | ENSG00000243444 | PALM2     | 41    | 0.69 | 0.009   |
|  | ENSG00000184792 | OSBP2     | 74    | 0.7  | 0.009   |
|  | ENSG00000198336 | MYL4      | 26    | 0.7  | 0.0098  |
|  | ENSG00000047597 | XK        | 52    | 0.71 | 0.009   |
|  | ENSG00000170180 | GYPA      | 30    | 0.72 | 0.0031  |
|  | ENSG00000130775 | THEMIS2   | 150   | 0.73 | 0.0022  |

|                               |                 |           |       |       |         |
|-------------------------------|-----------------|-----------|-------|-------|---------|
|                               | ENSG00000075340 | ADD2      | 8.7   | 0.74  | 0.0017  |
|                               | ENSG00000106327 | TFR2      | 5.1   | 0.74  | 0.0019  |
|                               | ENSG00000004939 | SLC4A1    | 400   | 0.76  | 0.0015  |
|                               | ENSG00000188672 | RHCE      | 10    | 0.76  | 0.0028  |
|                               | ENSG00000163554 | SPTA1     | 150   | 0.77  | 0.0022  |
|                               | ENSG00000125845 | BMP2      | 88    | 0.78  | 9e-04   |
|                               | ENSG00000187010 | RHD       | 4.7   | 0.79  | 0.00011 |
|                               | ENSG00000184557 | SOCS3     | 420   | 0.81  | 0.00016 |
|                               | ENSG00000029534 | ANK1      | 110   | 0.82  | 0.00075 |
|                               | ENSG00000169507 | SLC38A11  | 26    | 0.82  | 0.00046 |
|                               | ENSG00000196843 | ARID5A    | 130   | 0.84  | 0.00011 |
|                               | ENSG00000112077 | RHAG      | 9.6   | 0.85  | 2.1e-05 |
|                               | ENSG00000164398 | ACSL6     | 9.2   | 0.85  | 0.00017 |
|                               | ENSG00000169877 | AHSP      | 47    | 0.85  | 0.00016 |
|                               | ENSG00000250182 | NA        | 24    | 1.3   | 5.7e-11 |
| DM2 vs CTL,<br>down-regulated | ENSG00000198711 | SSBP3-AS1 | 14    | -0.59 | 0.048   |
|                               | ENSG00000273035 | NA        | 45    | -0.55 | 0.036   |
|                               | ENSG00000204941 | PSG5      | 29000 | -0.53 | 0.048   |
|                               | ENSG00000178966 | RMI1      | 140   | -0.47 | 0.043   |
|                               | ENSG00000180346 | TIGD2     | 790   | -0.46 | 0.019   |
|                               | ENSG00000171943 | SRGAP2C   | 260   | -0.45 | 0.029   |
|                               | ENSG00000159596 | TMEM69    | 160   | -0.44 | 0.009   |
|                               | ENSG00000030419 | IKZF2     | 880   | -0.38 | 0.042   |
|                               | ENSG00000157259 | GATAD1    | 730   | -0.34 | 0.021   |
|                               | ENSG00000155313 | USP25     | 2300  | -0.33 | 0.036   |
|                               | ENSG00000165516 | KLHDC2    | 580   | -0.33 | 0.027   |
|                               | ENSG00000197323 | TRIM33    | 2900  | -0.3  | 0.0053  |
|                               | ENSG00000141446 | ESCO1     | 680   | -0.27 | 0.038   |
|                               | ENSG00000000457 | SCYL3     | 530   | -0.26 | 0.038   |
|                               | ENSG00000153147 | SMARCA5   | 2100  | -0.26 | 0.042   |
|                               | ENSG00000092439 | TRPM7     | 2700  | -0.25 | 0.043   |
|                               | ENSG00000005810 | MYCBP2    | 3900  | -0.21 | 0.021   |
|                               | ENSG00000116560 | SFPQ      | 5800  | -0.19 | 0.038   |

|                               |                 |           |      |       |         |
|-------------------------------|-----------------|-----------|------|-------|---------|
| GDM vs DM2,<br>down-regulated | ENSG00000250182 | NA        | 24   | -1.1  | 1.3e-06 |
|                               | ENSG00000169507 | SLC38A11  | 26   | -0.96 | 1.3e-05 |
|                               | ENSG00000196843 | ARID5A    | 130  | -0.83 | 0.00064 |
|                               | ENSG00000088320 | REM1      | 15   | -0.78 | 0.0051  |
|                               | ENSG00000042062 | RIPOR3    | 55   | -0.76 | 0.0076  |
|                               | ENSG00000256269 | HMBS      | 75   | -0.74 | 0.0078  |
|                               | ENSG00000184557 | SOCS3     | 420  | -0.72 | 0.009   |
|                               | ENSG00000163554 | SPTA1     | 150  | -0.71 | 0.026   |
|                               | ENSG00000206172 | HBA1      | 590  | -0.7  | 0.025   |
|                               | ENSG00000243444 | PALM2     | 41   | -0.68 | 0.041   |
|                               | ENSG00000105650 | PDE4C     | 36   | -0.66 | 0.041   |
|                               | ENSG00000105650 | LOC729966 | 36   | -0.66 | 0.041   |
|                               | ENSG00000143416 | SELENBP1  | 240  | -0.66 | 0.031   |
|                               | ENSG00000164398 | ACSL6     | 9.2  | -0.65 | 0.032   |
|                               | ENSG00000188536 | HBA2      | 3200 | -0.65 | 0.043   |
|                               | ENSG00000213626 | LBH       | 590  | -0.65 | 0.046   |
|                               | ENSG00000148842 | CNNM2     | 570  | -0.63 | 0.00056 |
|                               | ENSG00000169877 | AHSP      | 47   | -0.63 | 0.046   |
|                               | ENSG00000013306 | SLC25A39  | 610  | -0.62 | 0.012   |
|                               | ENSG00000017483 | SLC38A5   | 5.2  | -0.62 | 0.046   |
|                               | ENSG00000124098 | FAM210B   | 450  | -0.59 | 0.0018  |
|                               | ENSG00000198876 | DCAF12    | 870  | -0.54 | 0.02    |
|                               | ENSG00000153253 | SCN3A     | 13   | -0.49 | 0.0025  |
| GDM vs DM2, up-<br>regulated  | ENSG00000109046 | WSB1      | 8400 | 0.29  | 0.046   |
|                               | ENSG00000165516 | KLHDC2    | 580  | 0.36  | 0.043   |
|                               | ENSG00000265185 | SNORD3B-1 | 160  | 0.38  | 0.012   |
|                               | ENSG00000134245 | WNT2B     | 450  | 0.62  | 0.024   |
| DM2 vs DM1, up-<br>regulated  | ENSG00000173432 | SAA1      | 29   | 0.56  | 0.0049  |
|                               | ENSG00000196843 | ARID5A    | 130  | 0.69  | 0.038   |
|                               | ENSG00000169507 | SLC38A11  | 26   | 0.94  | 3.8e-05 |
|                               | ENSG00000250182 | NA        | 24   | 1.3   | 6.4e-10 |
| GDM vs DM1, up-<br>regulated  | ENSG00000181019 | NQO1      | 63   | 0.53  | 0.025   |
|                               | ENSG00000179256 | SMCO3     | 11   | 0.82  | 0.012   |

|               |                 |    |    |      |       |
|---------------|-----------------|----|----|------|-------|
| PE vs healthy | ENSG00000229344 | NA | 11 | 0.34 | 0.013 |
|---------------|-----------------|----|----|------|-------|

**Supplement Table S2. Differential expressed genes between placentas with male vs placenta with female fetuses.**

| Comparison                  | Gene iD         | Gene Name | Base Mean | log2fc | Adjusted p-value |
|-----------------------------|-----------------|-----------|-----------|--------|------------------|
| Male vs female up-regulated | ENSG00000001626 | CFTR      | 40.2      | 0.375  | 0.000837         |
|                             | ENSG00000012817 | KDM5D     | 643       | 6.36   | 0                |
|                             | ENSG00000047634 | SCML1     | 344       | 0.241  | 0.0342           |
|                             | ENSG00000067048 | DDX3Y     | 931       | 6      | 0                |
|                             | ENSG00000067646 | ZFY       | 323       | 5.4    | 0                |
|                             | ENSG00000092377 | TBL1Y     | 4.25      | 1.28   | 3.78e-55         |
|                             | ENSG00000099715 | PCDH11Y   | 389       | 3.94   | 0                |
|                             | ENSG00000099725 | PRKY      | 186       | 5.02   | 0                |
|                             | ENSG00000102271 | KLHL4     | 3.57      | 0.239  | 0.0492           |
|                             | ENSG00000113649 | TCERG1    | 1140      | 0.0794 | 0.00876          |
|                             | ENSG00000114374 | USP9Y     | 889       | 6.17   | 0                |
|                             | ENSG00000118785 | SPP1      | 8530      | 0.327  | 0.0198           |
|                             | ENSG00000121741 | ZMYM2     | 1860      | 0.134  | 0.00864          |
|                             | ENSG00000129824 | RPS4Y1    | 576       | 6.49   | 0                |
|                             | ENSG00000131002 | TXLNGY    | 251       | 4.4    | 0                |
|                             | ENSG00000143153 | ATP1B1    | 338       | 0.277  | 0.00205          |
|                             | ENSG00000147180 | ZNF711    | 136       | 0.299  | 0.0334           |
|                             | ENSG00000151136 | BTBD11    | 42.9      | 0.313  | 0.0336           |
|                             | ENSG00000154620 | TMSB4Y    | 7.03      | 1.91   | 8.93e-114        |
|                             | ENSG00000165138 | ANKS6     | 177       | 0.201  | 0.00918          |
|                             | ENSG00000165246 | NLGN4Y    | 23.2      | 0.615  | 7.7e-20          |
|                             | ENSG00000165259 | HDX       | 11.6      | 0.338  | 0.0111           |
|                             | ENSG00000172294 | CSPG4P4Y  | 0.653     | 0.141  | 0.0118           |
|                             | ENSG00000176728 | TTY14     | 40.4      | 3.1    | 0                |
|                             | ENSG00000183778 | B3GALT5   | 28.7      | 0.327  | 0.0229           |
|                             | ENSG00000183878 | UTY       | 1020      | 6.75   | 0                |
|                             | ENSG00000185070 | FLRT2     | 42.8      | 0.309  | 0.0429           |
|                             | ENSG00000185275 | CD24P4    | 2.88      | 0.873  | 5.75e-28         |

|                 |              |       |       |           |
|-----------------|--------------|-------|-------|-----------|
| ENSG00000186453 | FAM228A      | 12.7  | 0.318 | 0.0328    |
| ENSG00000188399 | ANKRD36P1    | 2.93  | 0.181 | 0.000858  |
| ENSG00000189369 | GSPT2        | 47.2  | 0.295 | 0.0455    |
| ENSG00000198692 | EIF1AY       | 131   | 4.82  | 0         |
| ENSG00000206159 | GYG2P1       | 26.2  | 3.02  | 1.92e-296 |
| ENSG00000214207 | KRT18P10     | 12.1  | 2.05  | 2.69e-133 |
| ENSG00000215506 | TPTE2P4      | 4.93  | 0.164 | 0.00273   |
| ENSG00000215548 | FRG1JP       | 36.8  | 0.55  | 1.59e-8   |
| ENSG00000215580 | BCORP1       | 0.544 | 0.208 | 0.000346  |
| ENSG00000219607 | PPP1R3G      | 18.2  | 0.27  | 0.0401    |
| ENSG00000219665 | CTD-2006C1.2 | 84.8  | 0.211 | 0.0134    |
| ENSG00000224060 | ARSEP1       | 0.623 | 0.18  | 0.00121   |
| ENSG00000225117 | ARSDP1       | 1.94  | 0.527 | 1.68e-15  |
| ENSG00000226555 | AGKP1        | 2.91  | 0.374 | 5.6e-10   |
| ENSG00000226863 | SHROOM2P1    | 1.08  | 0.457 | 1.59e-12  |
| ENSG00000227447 | XGY1         | 0.935 | 0.306 | 1.7e-7    |
| ENSG00000228764 | ZNF885P      | 0.694 | 0.224 | 0.0000589 |
| ENSG00000228786 | LINC00266-4P | 1.68  | 0.519 | 4.73e-15  |
| ENSG00000229163 | NAP1L1P2     | 1.22  | 0.472 | 4.59e-13  |
| ENSG00000229236 | TTY10        | 14    | 2.63  | 1.91e-222 |
| ENSG00000229238 | PPP1R12BP1   | 2.43  | 0.164 | 0.00727   |
| ENSG00000229308 | AC010084.1   | 9.83  | 2.03  | 4.36e-128 |
| ENSG00000230663 | FAM224B      | 2.66  | 0.89  | 1.81e-31  |
| ENSG00000231535 | LINC00278    | 46.1  | 3.42  | 0         |
| ENSG00000232195 | TOMM22P2     | 0.427 | 0.171 | 0.00908   |
| ENSG00000232226 | ARSFP1       | 0.533 | 0.179 | 0.00195   |
| ENSG00000232730 | FAM8A4P      | 1.35  | 0.463 | 7.06e-13  |
| ENSG00000233070 | ZFY-AS1      | 4.72  | 1.35  | 4.82e-61  |
| ENSG00000233864 | TTY15        | 208   | 5.38  | 0         |
| ENSG00000234511 | C5orf58      | 5.29  | 0.278 | 0.0484    |
| ENSG00000235462 | TAB3P1       | 3.23  | 1.05  | 3.33e-40  |
| ENSG00000235649 | MXRA5Y       | 6.37  | 0.265 | 0.0439    |
| ENSG00000237659 | RNASEH2CP1   | 2.44  | 0.589 | 4.59e-18  |

|                                      |  |                 |               |       |        |            |
|--------------------------------------|--|-----------------|---------------|-------|--------|------------|
|                                      |  | ENSG00000241859 | ANOS2P        | 17.4  | 2.43   | 3.2e-184   |
|                                      |  | ENSG00000251841 | RNU6-1334P    | 0.764 | 0.256  | 0.00000708 |
|                                      |  | ENSG00000251996 | Y_RNA         | 0.804 | 0.359  | 4.64e-9    |
|                                      |  | ENSG00000252468 | RNU2-57P      | 5.4   | 1.59   | 3.25e-80   |
|                                      |  | ENSG00000252766 | RNU6-255P     | 1.13  | 0.498  | 6.69e-14   |
|                                      |  | ENSG00000257599 | OVCH1-AS1     | 1.67  | 0.208  | 0.00551    |
|                                      |  | ENSG00000260197 | RP11-424G14.1 | 8.33  | 2      | 1.39e-123  |
|                                      |  | ENSG00000267793 | RP11-576C2.1  | 3.81  | 1.1    | 8.68e-44   |
|                                      |  | ENSG00000273906 | RP11-115H13.1 | 3.56  | 1.13   | 3.29e-45   |
|                                      |  | ENSG00000277146 | RP11-557B9.1  | 1.2   | 0.123  | 0.0322     |
|                                      |  | ENSG00000277438 | RP11-256K9.1  | 2.03  | 0.878  | 2.77e-30   |
|                                      |  | ENSG00000278212 | MAFIP         | 7.34  | 1.19   | 6.62e-46   |
|                                      |  | ENSG00000278847 | RP11-414C23.1 | 1.5   | 0.664  | 2.36e-20   |
|                                      |  | ENSG00000282870 | FRG1DP        | 83.3  | 0.289  | 0.00481    |
|                                      |  | ENSG00000282995 | FRG1EP        | 50.1  | 0.342  | 0.00727    |
|                                      |  | ENSG00000283023 | FRG1GP        | 114   | 0.266  | 0.0107     |
|                                      |  | ENSG00000283047 | FRG1FP        | 9.56  | 0.463  | 0.000011   |
| Male vs<br>female down-<br>regulated |  | ENSG00000001497 | LAS1L         | 443   | -0.202 | 5.19e-10   |
|                                      |  | ENSG00000005889 | ZFX           | 2050  | -0.484 | 1.87e-67   |
|                                      |  | ENSG00000012174 | MBTPS2        | 527   | -0.402 | 1.89e-15   |
|                                      |  | ENSG00000018610 | CXorf56       | 582   | -0.2   | 0.0226     |
|                                      |  | ENSG00000072501 | SMC1A         | 2130  | -0.543 | 1.13e-137  |
|                                      |  | ENSG00000072506 | HSD17B10      | 242   | -0.298 | 2.45e-7    |
|                                      |  | ENSG00000086712 | TXLNG         | 227   | -0.191 | 7.73e-7    |
|                                      |  | ENSG00000089682 | RBM41         | 400   | -0.146 | 0.0143     |
|                                      |  | ENSG00000101846 | STS           | 10100 | -0.632 | 5.67e-19   |
|                                      |  | ENSG00000101882 | NKAP          | 246   | -0.182 | 0.00000357 |
|                                      |  | ENSG00000101966 | XIAP          | 1340  | -0.113 | 0.00481    |
|                                      |  | ENSG00000101972 | STAG2         | 2690  | -0.118 | 0.0401     |
|                                      |  | ENSG00000102030 | NAA10         | 315   | -0.326 | 2.3e-13    |
|                                      |  | ENSG00000102081 | FMR1          | 2850  | -0.146 | 0.0231     |
|                                      |  | ENSG00000102225 | CDK16         | 999   | -0.263 | 1.47e-11   |
|                                      |  | ENSG00000102309 | PIN4          | 158   | -0.24  | 0.0000269  |



|                 |          |       |        |           |
|-----------------|----------|-------|--------|-----------|
| ENSG00000115808 | STRN     | 1130  | -0.113 | 0.0289    |
| ENSG00000122824 | NUDT10   | 2.71  | -0.19  | 0.0021    |
| ENSG00000122861 | PLAU     | 1360  | -0.242 | 0.0492    |
| ENSG00000123496 | IL13RA2  | 19    | -0.315 | 0.00346   |
| ENSG00000124486 | USP9X    | 12600 | -0.179 | 0.0376    |
| ENSG00000125676 | THOC2    | 1690  | -0.135 | 0.000363  |
| ENSG00000126012 | KDM5C    | 2830  | -0.642 | 6.54e-117 |
| ENSG00000130021 | PUDP     | 413   | -0.67  | 4.69e-31  |
| ENSG00000130741 | EIF2S3   | 1180  | -0.395 | 8.88e-50  |
| ENSG00000130985 | UBA1     | 2090  | -0.323 | 2.74e-32  |
| ENSG00000133789 | SWAP70   | 1960  | -0.123 | 0.0289    |
| ENSG00000143365 | RORC     | 6.83  | -0.317 | 0.0261    |
| ENSG00000147050 | KDM6A    | 1370  | -0.798 | 1.11e-149 |
| ENSG00000147065 | MSN      | 2350  | -0.152 | 0.0492    |
| ENSG00000147099 | HDAC8    | 317   | -0.308 | 3.64e-17  |
| ENSG00000147113 | CXorf36  | 1290  | -0.521 | 7.61e-16  |
| ENSG00000147162 | OGT      | 4760  | -0.151 | 0.00198   |
| ENSG00000154162 | CDH12    | 15.6  | -0.189 | 0.0385    |
| ENSG00000165195 | PIGA     | 534   | -0.21  | 0.0401    |
| ENSG00000165775 | FUNDC2   | 406   | -0.126 | 0.0492    |
| ENSG00000166473 | PKD1L2   | 159   | -0.31  | 0.0395    |
| ENSG00000169239 | CA5B     | 141   | -0.242 | 0.000607  |
| ENSG00000169249 | ZRSR2    | 110   | -0.275 | 3.14e-7   |
| ENSG00000172943 | PHF8     | 973   | -0.133 | 0.000288  |
| ENSG00000173674 | EIF1AX   | 642   | -0.555 | 2.51e-51  |
| ENSG00000173681 | CXorf23  | 536   | -0.375 | 1.42e-14  |
| ENSG00000181704 | YIPF6    | 1850  | -0.23  | 0.000264  |
| ENSG00000185515 | BRCC3    | 290   | -0.188 | 0.000346  |
| ENSG00000186312 | CA5BP1   | 123   | -0.249 | 0.0000215 |
| ENSG00000188419 | CHM      | 459   | -0.337 | 1.85e-27  |
| ENSG00000198034 | RPS4X    | 3520  | -0.395 | 4.09e-21  |
| ENSG00000200354 | SNORA71D | 53    | -0.28  | 0.031     |
| ENSG00000200792 | SNORA80A | 39.4  | -0.294 | 0.0303    |

|                 |                      |       |        |            |
|-----------------|----------------------|-------|--------|------------|
| ENSG00000207088 | SNORA7B              | 134   | -0.219 | 0.0312     |
| ENSG00000208892 | SNORA49              | 361   | -0.24  | 0.00198    |
| ENSG00000210196 | MT-TP                | 19.1  | -0.307 | 0.0339     |
| ENSG00000215301 | DDX3X                | 8070  | -0.557 | 1.4e-74    |
| ENSG00000222489 | SNORA79              | 183   | -0.23  | 0.0308     |
| ENSG00000223546 | LINC00630            | 213   | -0.184 | 0.00732    |
| ENSG00000224430 | MKRN5P               | 348   | -0.171 | 0.0292     |
| ENSG00000224975 | INE1                 | 73.5  | -0.362 | 2.85e-8    |
| ENSG00000225091 | SNORA71A             | 66.7  | -0.28  | 0.0226     |
| ENSG00000225470 | JPX                  | 438   | -0.365 | 2.13e-29   |
| ENSG00000226641 | RP13-13A3.1          | 4.67  | -0.388 | 0.00109    |
| ENSG00000227329 | RP11-258C19.4        | 0.77  | -0.223 | 0.00921    |
| ENSG00000228550 | RP11-483M24.2        | 6.27  | -0.348 | 0.00918    |
| ENSG00000228906 | RP13-216E22.4        | 72    | -0.259 | 0.00375    |
| ENSG00000229807 | XIST                 | 13000 | -0.751 | 4.77e-24   |
| ENSG00000230590 | FTX                  | 1940  | -0.142 | 0.0144     |
| ENSG00000230797 | YY2                  | 31.8  | -0.261 | 0.014      |
| ENSG00000235262 | KDM5C-IT1            | 17.9  | -0.591 | 7.37e-13   |
| ENSG00000236120 | RP11-733O18.1        | 29.4  | -0.314 | 0.0222     |
| ENSG00000239407 | LL0XNC01-<br>237H1.2 | 91.4  | -0.179 | 0.0339     |
| ENSG00000252481 | SCARNA13             | 1750  | -0.162 | 0.0133     |
| ENSG00000265727 | RN7SL648P            | 257   | -0.161 | 0.00195    |
| ENSG00000270641 | TSIX                 | 2.62  | -0.763 | 2.48e-21   |
| ENSG00000271430 | RP3-368A4.5          | 1820  | -0.133 | 0.0251     |
| ENSG00000271533 | RP3-368A4.6          | 1560  | -0.149 | 0.0206     |
| ENSG00000272533 | SNORA28              | 31.8  | -0.278 | 0.00581    |
| ENSG00000279682 | RP11-791N19.1        | 16.6  | -0.479 | 0.00000208 |
